# Supplementary material for: The Impact of Subsidies on the Ecological Sustainability and Future Profits from North Sea Fisheries
Source: PLOS journal article supplement (doi:10.1371/journal.pone.0020239), 2011-05-26
Supplement: S2 (10.1371/journal.pone.0020239.s002) [file journal.pone.0020239.s002]

**Table S2:** Fixed cost and effort-related subsidies by subsidy type.

| <b>Subsidy type</b>               | <b>Predicted effect of subsidy</b> | <b>Effort-related or fixed cost subsidy</b> |
|-----------------------------------|------------------------------------|---------------------------------------------|
| Boat construction & modernization | Capacity enhancing                 | Fixed cost                                  |
| Development projects              | Capacity enhancing                 | Fixed cost                                  |
| Port construction                 | Capacity enhancing                 | Fixed cost                                  |
| Marketing & storage support       | Capacity enhancing                 | Effort-related                              |
| Tax exemptions                    | Capacity enhancing                 | Effort-related                              |
| Fuel subsidy                      | Capacity enhancing                 | Effort-related                              |
| Fisher assistance programs        | Ambiguous                          | Effort-related                              |
| Vessel buyback programs           | Ambiguous                          | Fixed cost                                  |
| Rural development programs        | Ambiguous                          | Fixed cost                                  |
