# Supplementary material for: The Impact of Subsidies on the Ecological Sustainability and Future Profits from North Sea Fisheries
Source: PLOS journal article supplement (doi:10.1371/journal.pone.0020239), 2011-05-26
Supplement: S4 (10.1371/journal.pone.0020239.s004) [file journal.pone.0020239.s004]

**Table S4:** Sources for effort data used in the hindcast simulations.

| Fleet                  | Period available | Source and notes                                                                                                          |
|------------------------|------------------|---------------------------------------------------------------------------------------------------------------------------|
| Demersal trawl & seine | 1978-2008        | (WGNSK08, 2008), including fleets SCOSEI_IV, SCOLTR_IV, ENGTRL_IV, ENGSEI_IV, FRATRB_IV, FRATRO_IV, NORTRL_IV, GER_OTB_IV |
| Beam trawl             | 1979-2007        | (WGNSK08, 2008), including fleets NL_BT_EFF,UK_BT_EFF                                                                     |
| Pelagic trawl & seine  | 1987-2006        | (WGNSK08, 2008) fleet NOR_DEN_NPOUT_EFF                                                                                   |
| Nephrops trawl         | 1981-2004        | (WGNSK06, 2006), summed over Nephrops functional units                                                                    |
| Shrimp trawl           | 1984-2003        | (WGPAN, 2005), Pandulus – total international effort in ICES div IV.                                                      |
